# Supplementary material for: Colon cancer molecular subtypes identified by expression profiling and associated to stroma, mucinous type and different clinical behavior
Source: PubMed Central journal article supplement (PMC3571914; doi:10.1186/1471-2407-12-260), 2012-06-19
Supplement: 1471-2407-12-260-S4.pdf [file 1471-2407-12-260-S4.pdf]

|    | Parametric p-value | % CV support | Unique id | GB acc                       |
|----|--------------------|--------------|-----------|------------------------------|
| 1  | < 1e-07            | 100          | Hs.112949 | <a href="#">NM_001080494</a> |
| 2  | < 1e-07            | 100          | Hs.282795 | <a href="#">CR749831</a>     |
| 3  | < 1e-07            | 100          | Hs.481704 | <a href="#">NM_019000</a>    |
| 4  | < 1e-07            | 100          | Hs.647064 | <a href="#">NM_002889</a>    |
| 5  | < 1e-07            | 100          | Hs.62886  | <a href="#">NM_004684</a>    |
| 6  | < 1e-07            | 100          | Hs.325960 | <a href="#">NM_024021</a>    |
| 7  | < 1e-07            | 100          | Hs.494173 | <a href="#">NM_000700</a>    |
| 8  | < 1e-07            | 100          | Hs.297413 | <a href="#">NM_004994</a>    |
| 9  | < 1e-07            | 100          | Hs.714347 | <a href="#">NM_016206</a>    |
| 10 | < 1e-07            | 100          | Hs.468675 | <a href="#">NM_006474</a>    |
| 11 | < 1e-07            | 100          | Hs.556600 | <a href="#">NM_053025</a>    |
| 12 | < 1e-07            | 100          | Hs.8904   | <a href="#">NM_007268</a>    |
| 13 | < 1e-07            | 100          | Hs.77274  | <a href="#">NM_002658</a>    |
| 14 | < 1e-07            | 100          | Hs.67726  | <a href="#">NM_006770</a>    |
| 15 | < 1e-07            | 100          | Hs.591346 | <a href="#">NM_001901</a>    |
| 16 | < 1e-07            | 100          | Hs.332197 | <a href="#">AF200348</a>     |
| 17 | < 1e-07            | 100          | Hs.203717 | <a href="#">BE710245</a>     |
| 18 | < 1e-07            | 100          | Hs.475353 | <a href="#">NM_014583</a>    |
| 19 | < 1e-07            | 100          | Hs.583348 | <a href="#">NM_002192</a>    |
| 20 | < 1e-07            | 100          | Hs.143250 | <a href="#">NM_002160</a>    |
| 21 | < 1e-07            | 100          | Hs.154654 | <a href="#">NM_000104</a>    |
| 22 | < 1e-07            | 100          | Hs.302085 | <a href="#">NM_000961</a>    |
| 23 | < 1e-07            | 100          | Hs.479119 | <a href="#">NM_053044</a>    |
| 24 | < 1e-07            | 100          | Hs.465929 | <a href="#">NM_001299</a>    |
| 25 | < 1e-07            | 100          | Hs.363396 | <a href="#">NM_001014975</a> |
| 26 | < 1e-07            | 100          | Hs.122561 | <a href="#">NM_182566</a>    |
| 27 | < 1e-07            | 100          | Hs.592775 | <a href="#">AK023391</a>     |
| 28 | < 1e-07            | 100          | Hs.522891 | <a href="#">NM_000609</a>    |
| 29 | < 1e-07            | 100          | Hs.122927 | <a href="#">NM_024692</a>    |
| 30 | < 1e-07            | 100          | Hs.343522 | <a href="#">NM_001001396</a> |
| 31 | < 1e-07            | 100          | Hs.434914 | <a href="#">NM_152330</a>    |
| 32 | < 1e-07            | 100          | Hs.500483 | <a href="#">NM_001613</a>    |
| 33 | < 1e-07            | 100          | Hs.313    | <a href="#">NM_000582</a>    |
| 34 | < 1e-07            | 100          | Hs.654439 | <a href="#">CA307890</a>     |
| 35 | < 1e-07            | 100          | Hs.644633 | <a href="#">NM_000362</a>    |
| 36 | < 1e-07            | 100          | Hs.518662 | <a href="#">NM_052966</a>    |
| 37 | < 1e-07            | 100          | Hs.632466 | <a href="#">NM_000396</a>    |
| 38 | < 1e-07            | 100          | Hs.658956 | <a href="#">NM_018004</a>    |
| 39 | < 1e-07            | 100          | Hs.477128 | <a href="#">NM_199511</a>    |
| 40 | < 1e-07            | 100          | Hs.712631 | <a href="#">NM_030786</a>    |
| 41 | < 1e-07            | 100          | Hs.300772 | <a href="#">NM_213674</a>    |
| 42 | < 1e-07            | 100          | Hs.406475 | <a href="#">AW276332</a>     |
| 43 | < 1e-07            | 100          | Hs.134830 | <a href="#">AL359062</a>     |
| 44 | < 1e-07            | 100          | Hs.44385  | <a href="#">NM_006873</a>    |
| 45 | < 1e-07            | 100          | Hs.172928 | <a href="#">Z74615</a>       |
| 46 | < 1e-07            | 100          | Hs.116471 | <a href="#">NM_001797</a>    |
| 47 | < 1e-07            | 100          | Hs.592317 | <a href="#">NM_003239</a>    |
| 48 | < 1e-07            | 100          | Hs.714027 | <a href="#">BE835321</a>     |
| 49 | < 1e-07            | 100          | Hs.522632 | <a href="#">NM_003254</a>    |
| 50 | < 1e-07            | 100          | Hs.264887 | <a href="#">NM_023110</a>    |
| 51 | < 1e-07            | 100          | Hs.198862 | <a href="#">NM_001004019</a> |
| 52 | < 1e-07            | 100          | Hs.93675  | <a href="#">NM_007021</a>    |
| 53 | < 1e-07            | 100          | Hs.298198 | <a href="#">NM_144601</a>    |
| 54 | < 1e-07            | 100          | Hs.101302 | <a href="#">NM_004370</a>    |
| 55 | < 1e-07            | 100          | Hs.405614 | <a href="#">NM_138455</a>    |
| 56 | < 1e-07            | 100          | Hs.136348 | <a href="#">NM_006475</a>    |
| 57 | < 1e-07            | 100          | Hs.40098  | <a href="#">NM_013372</a>    |
| 58 | < 1e-07            | 100          | Hs.643338 | <a href="#">NM_004598</a>    |
| 59 | < 1e-07            | 100          | Hs.368921 | <a href="#">NM_001856</a>    |
| 60 | < 1e-07            | 100          | Hs.490203 | <a href="#">NM_033138</a>    |
| 61 | < 1e-07            | 100          | Hs.420269 | <a href="#">NM_001849</a>    |

|     |          |     |           |                              |
|-----|----------|-----|-----------|------------------------------|
| 62  | < 1e-07  | 100 | Hs.165859 | <a href="#">NM_032208</a>    |
| 63  | < 1e-07  | 100 | Hs.503911 | <a href="#">NM_006169</a>    |
| 64  | < 1e-07  | 100 | Hs.481022 | <a href="#">NM_003013</a>    |
| 65  | < 1e-07  | 100 | Hs.591133 | <a href="#">NM_000138</a>    |
| 66  | < 1e-07  | 100 | Hs.474053 | <a href="#">NM_001848</a>    |
| 67  | < 1e-07  | 100 | Hs.443625 | <a href="#">NM_000090</a>    |
| 68  | < 1e-07  | 100 | Hs.489142 | <a href="#">NM_000089</a>    |
| 69  | < 1e-07  | 100 | Hs.437191 | <a href="#">NM_012232</a>    |
| 70  | < 1e-07  | 100 | Hs.439463 | <a href="#">NM_001129</a>    |
| 71  | < 1e-07  | 100 | Hs.371147 | <a href="#">L12350</a>       |
| 72  | < 1e-07  | 100 | Hs.438993 | <a href="#">NM_005504</a>    |
| 73  | < 1e-07  | 100 | Hs.21509  | <a href="#">NM_000168</a>    |
| 74  | < 1e-07  | 100 | Hs.99528  | <a href="#">BM999343</a>     |
| 75  | < 1e-07  | 100 | Hs.654370 | <a href="#">NM_004460</a>    |
| 76  | < 1e-07  | 100 | Hs.190495 | <a href="#">NM_001005340</a> |
| 77  | 1.00E-07 | 100 | Hs.651244 | <a href="#">NM_005814</a>    |
| 78  | 1.00E-07 | 100 | Hs.525607 | <a href="#">NM_006291</a>    |
| 79  | 1.00E-07 | 100 | Hs.696554 | <a href="#">NM_004791</a>    |
| 80  | 2.00E-07 | 100 | Hs.170131 | <a href="#">AK129956</a>     |
| 81  | 2.00E-07 | 100 | Hs.85862  | <a href="#">NM_014476</a>    |
| 82  | 3.00E-07 | 100 | Hs.655832 | <a href="#">NM_032876</a>    |
| 83  | 4.00E-07 | 100 | Hs.643005 | <a href="#">NM_014585</a>    |
| 84  | 4.00E-07 | 100 | Hs.656904 | <a href="#">NM_148672</a>    |
| 85  | 4.00E-07 | 100 | Hs.709761 | <a href="#">AW268902</a>     |
| 86  | 4.00E-07 | 100 | Hs.514107 | <a href="#">D00044</a>       |
| 87  | 5.00E-07 | 100 | Hs.709230 | <a href="#">NM_005086</a>    |
| 88  | 7.00E-07 | 100 | Hs.591853 | <a href="#">NM_004063</a>    |
| 89  | 8.00E-07 | 100 | Hs.508716 | <a href="#">NM_001846</a>    |
| 90  | 1.00E-06 | 100 | Hs.403933 | <a href="#">NM_058229</a>    |
| 91  | 1.90E-06 | 100 | Hs.304475 | <a href="#">NM_005565</a>    |
| 92  | 2.00E-06 | 100 | Hs.472101 | <a href="#">NM_000933</a>    |
| 93  | 2.10E-06 | 100 | Hs.713533 | <a href="#">NM_206943</a>    |
| 94  | 2.40E-06 | 100 | Hs.521432 | <a href="#">NM_021020</a>    |
| 95  | 2.60E-06 | 100 | Hs.535845 | <a href="#">NM_004348</a>    |
| 96  | 2.60E-06 | 100 | Hs.8867   | <a href="#">NM_001554</a>    |
| 97  | 2.70E-06 | 100 | Hs.753    | <a href="#">NM_002029</a>    |
| 98  | 2.70E-06 | 100 | Hs.526594 | <a href="#">AK023854</a>     |
| 99  | 3.40E-06 | 100 | Hs.296049 | <a href="#">NM_002404</a>    |
| 100 | 3.50E-06 | 100 | Hs.177841 | <a href="#">NM_030762</a>    |
| 101 | 4.80E-06 | 100 | Hs.293917 | <a href="#">BC017572</a>     |
| 102 | 5.10E-06 | 100 | Hs.527973 | <a href="#">NM_003955</a>    |
| 103 | 5.20E-06 | 100 | Hs.302257 | <a href="#">NM_173653</a>    |
| 104 | 5.20E-06 | 100 | Hs.463035 | <a href="#">NM_021939</a>    |
| 105 | 7.20E-06 | 100 | Hs.287714 | <a href="#">NM_006834</a>    |
| 106 | 7.40E-06 | 100 | Hs.105460 | <a href="#">NM_015393</a>    |
| 107 | 7.80E-06 | 100 | Hs.359698 | <a href="#">NM_000790</a>    |
| 108 | 7.80E-06 | 100 | Hs.503074 | <a href="#">NM_018043</a>    |
| 109 | 9.20E-06 | 100 | Hs.460109 | <a href="#">CB240572</a>     |
| 110 | 1.06E-05 | 100 | Hs.705394 | <a href="#">NM_006108</a>    |
| 111 | 1.44E-05 | 100 | Hs.81134  | <a href="#">NM_173842</a>    |
| 112 | 1.63E-05 | 100 | Hs.374950 | <a href="#">NM_005952</a>    |
| 113 | 2.05E-05 | 100 | Hs.143751 | <a href="#">NM_005940</a>    |
| 114 | 2.21E-05 | 100 | Hs.156471 | <a href="#">NM_014553</a>    |
| 115 | 2.28E-05 | 100 | Hs.288034 | <a href="#">NM_022154</a>    |
| 116 | 2.36E-05 | 100 | Hs.647358 | <a href="#">X97261</a>       |
| 117 | 2.48E-05 | 100 | Hs.656629 | <a href="#">NM_005947</a>    |
| 118 | 2.92E-05 | 100 | Hs.430299 | <a href="#">NM_018663</a>    |
| 119 | 3.37E-05 | 100 | Hs.508343 | <a href="#">NM_014324</a>    |
| 120 | 3.69E-05 | 100 | Hs.203691 | <a href="#">NM_080927</a>    |
| 121 | 3.74E-05 | 100 | Hs.637017 | <a href="#">AK055112</a>     |
| 122 | 3.77E-05 | 100 | Hs.348264 | <a href="#">NM_033423</a>    |
| 123 | 3.81E-05 | 100 | Hs.303090 | <a href="#">NM_005398</a>    |
| 124 | 3.89E-05 | 100 | Hs.162143 | <a href="#">NM_152321</a>    |

|     |           |     |           |                              |
|-----|-----------|-----|-----------|------------------------------|
| 125 | 5.29E-05  | 100 | Hs.9613   | <a href="#">NM_139314</a>    |
| 126 | 5.74E-05  | 100 | Hs.705503 | <a href="#">NM_001338</a>    |
| 127 | 6.33E-05  | 100 | Hs.353208 | <a href="#">NM_173574</a>    |
| 128 | 7.45E-05  | 100 | Hs.1437   | <a href="#">NM_000152</a>    |
| 129 | 7.89E-05  | 100 | Hs.301350 | <a href="#">NM_005971</a>    |
| 130 | 9.27E-05  | 100 | Hs.517227 | <a href="#">NM_021219</a>    |
| 131 | 0.0001079 | 100 | Hs.227817 | <a href="#">NM_004049</a>    |
| 132 | 0.0001178 | 100 | Hs.409934 | <a href="#">M20432</a>       |
| 133 | 0.0001206 | 100 | Hs.534322 | <a href="#">BC106057</a>     |
| 134 | 0.0001329 | 100 | Hs.162795 | <a href="#">NM_002153</a>    |
| 135 | 0.0001433 | 100 | Hs.364941 | <a href="#">NM_000862</a>    |
| 136 | 0.0001507 | 100 | Hs.504657 | <a href="#">NM_016184</a>    |
| 137 | 0.0001545 | 100 | Hs.111944 | <a href="#">NM_000765</a>    |
| 138 | 0.0001565 | 100 | Hs.436657 | <a href="#">NM_203339</a>    |
| 139 | 0.0001808 | 100 | Hs.302738 | <a href="#">NM_000112</a>    |
| 140 | 0.0001842 | 100 | Hs.433391 | <a href="#">NM_005950</a>    |
| 141 | 0.0002089 | 100 | Hs.83169  | <a href="#">NM_002421</a>    |
| 142 | 0.0002384 | 100 | Hs.109439 | <a href="#">NM_033014</a>    |
| 143 | 0.000239  | 100 | Hs.87779  | <a href="#">NM_145168</a>    |
| 144 | 0.0002582 | 100 | Hs.473927 | <a href="#">AK074662</a>     |
| 145 | 0.0002838 | 100 | Hs.74466  | <a href="#">NM_006890</a>    |
| 146 | 0.0002991 | 100 | Hs.657015 | <a href="#">NM_080489</a>    |
| 147 | 0.0003184 | 100 | Hs.591866 | <a href="#">NM_003114</a>    |
| 148 | 0.0003211 | 100 | Hs.398157 | <a href="#">NM_006622</a>    |
| 149 | 0.0003581 | 100 | Hs.1376   | <a href="#">NM_000196</a>    |
| 150 | 0.0003893 | 100 | Hs.289015 | <a href="#">NM_024307</a>    |
| 151 | 0.0003963 | 100 | Hs.650822 | <a href="#">BC040542</a>     |
| 152 | 0.0004023 | 100 | Hs.5302   | <a href="#">NM_006149</a>    |
| 153 | 0.0004612 | 100 | Hs.708051 | <a href="#">NM_007315</a>    |
| 154 | 0.0004663 | 100 | Hs.657374 | <a href="#">AK094963</a>     |
| 155 | 0.0004855 | 99  | Hs.82848  | <a href="#">NM_000450</a>    |
| 156 | 0.0005111 | 99  | Hs.171695 | <a href="#">NM_004417</a>    |
| 157 | 0.0005185 | 96  | Hs.512682 | <a href="#">NM_001024912</a> |
| 158 | 0.0005374 | 95  | Hs.111577 | <a href="#">NM_030926</a>    |
| 159 | 0.0005462 | 98  | Hs.470887 | <a href="#">NM_016315</a>    |
| 160 | 0.0005963 | 92  | Hs.530274 | <a href="#">NM_000035</a>    |
| 161 | 0.0006131 | 89  | Hs.444046 | <a href="#">NM_018092</a>    |
| 162 | 0.0006235 | 92  | Hs.516105 | <a href="#">AI659667</a>     |
| 163 | 0.0006654 | 79  | Hs.510078 | <a href="#">NM_005627</a>    |
| 164 | 0.0008028 | 63  | Hs.438462 | <a href="#">NM_005951</a>    |
| 165 | 0.0009039 | 48  | Hs.437609 | <a href="#">NM_001547</a>    |
| 166 | 0.0009256 | 43  | Hs.125139 | <a href="#">NM_018296</a>    |
| 167 | 0.0009684 | 40  | Hs.291030 | <a href="#">NM_006633</a>    |
